# Supplementary material for: COVID-19 ICU and mechanical ventilation patient characteristics and outcomes—A systematic review and meta-analysis
Source: PubMed Central journal article supplement (PMC7877631; doi:10.1371/journal.pone.0246318), 2021-02-11
Supplement: pone.0246318.s003.pdf [file pone.0246318.s003.pdf]

## **S1 File. Electronic search strategy**

**Library/Database:** PubMed

**Date of Search:** May 1, 2020

**Search String:** ("COVID-19" OR "SARS-Cov-2") AND ("ICU" or "ventilator" OR "mechanical ventilation" OR "critical care" OR "intensive care" OR "hospitalized" OR "outcomes")

**# Hits:** 1503

**Library/Database:** Scopus

**Date of Search:** May 1, 2020

**Search String:** Article title, Abstract, Keywords ("COVID-19" OR "SARS-Cov-2") AND ("ICU" or "ventilator" OR "mechanical ventilation" OR "critical care" OR "intensive care" OR "hospitalized" OR "outcomes")

**# Hits:** 1937

**Library/Database:** Virtual Health Library (VHL)

**Date of Search:** May 1, 2020

**Search String:** Title, Abstract, Subject ("COVID-19" OR "SARS-Cov-2") AND ("ICU" or "ventilator" OR "mechanical ventilation" OR "critical care" OR "intensive care" OR "hospitalized" OR "outcomes")

**# Hits:** 1716

**Library/Database:** medRxiv & bioRxiv

**Date of Search:** May 1, 2020

**Search String:** ("COVID-19" OR "SARS-Cov-2") AND ("ICU" or "ventilator" OR "mechanical ventilation" OR "critical care" OR "intensive care" OR "hospitalized" OR "outcomes")

**# Hits:** 2690
